# Supplementary material
Source: PubMed Central journal article supplement (PMC5322260)
Supplement: NIHMS800618-supplement-8.pdf [file NIHMS800618-supplement-8.pdf]

Cervical Squamous Cell Carcinoma and Endocervical Adenocarcinoma (TCGA, Provisional) (study.do?cancer\_study\_id=cesc\_tcga)  
Tumors with methylation data (HM450) (309 samples) / 2 Genes

Gene Set / Pathway is altered in 106 (34.3%) of queried samples

Modify Query

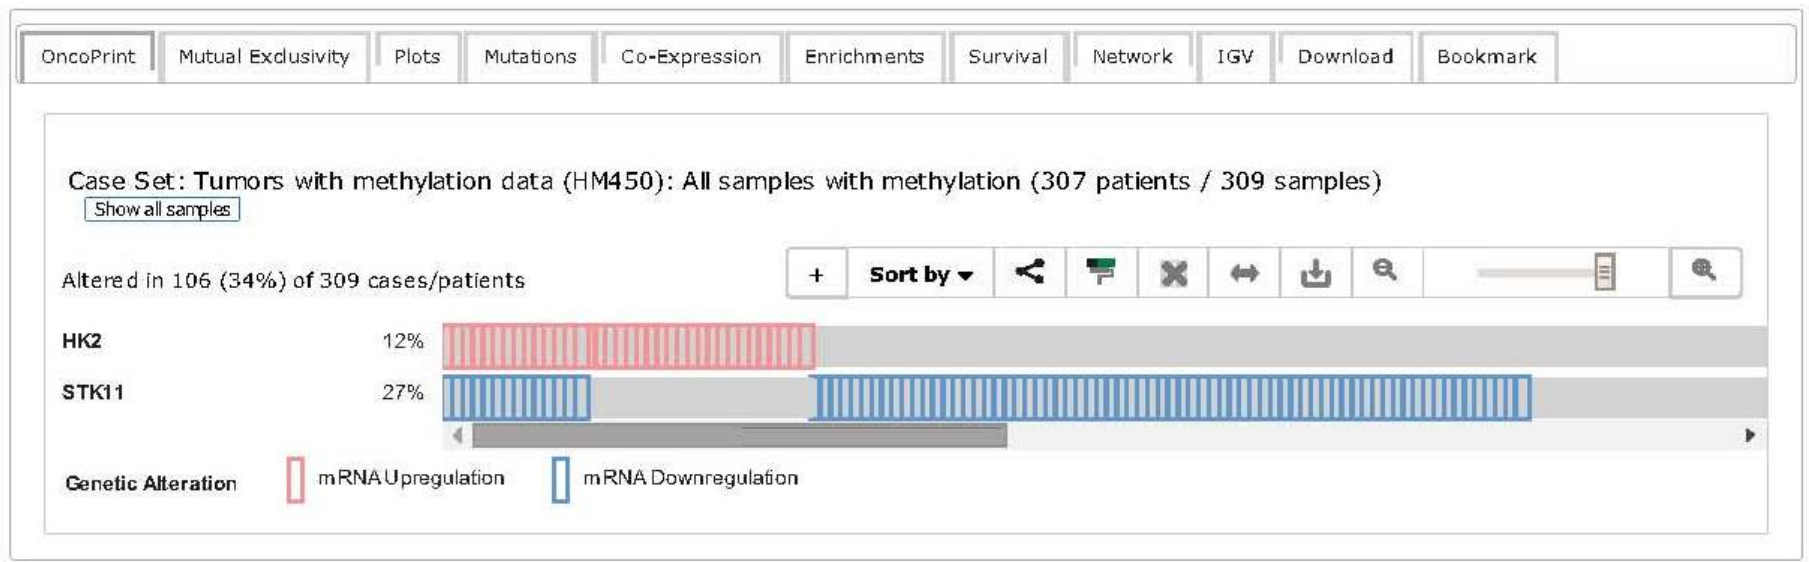

Supplementary Fig. 7
