# Supplementary material
Source: PubMed Central journal article supplement (PMC5322260)

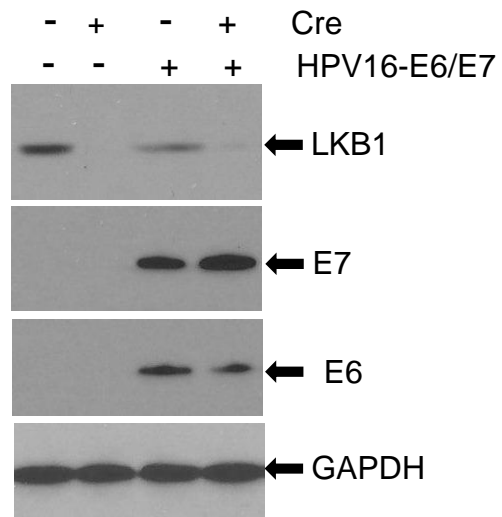

Supplementary Figure 1

Supplement: NIHMS800618-supplement-2.pdf [file NIHMS800618-supplement-2.pdf]

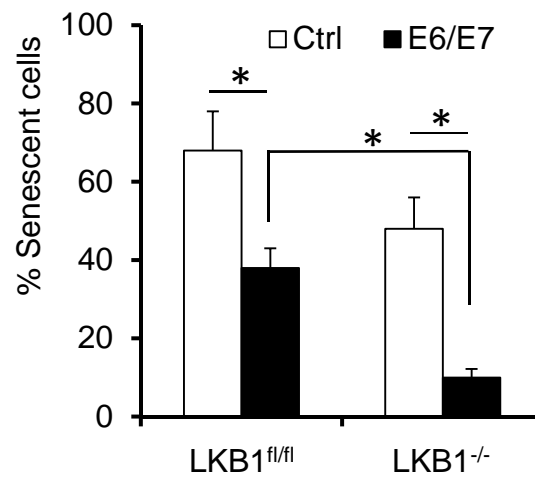

Supplementary Figure 2

Supplement: NIHMS800618-supplement-3.pdf [file NIHMS800618-supplement-3.pdf]

a

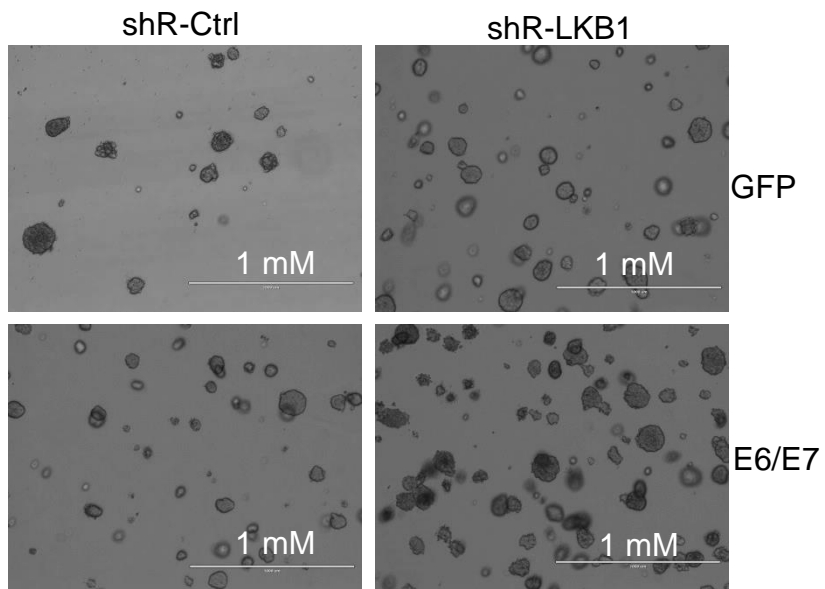

b

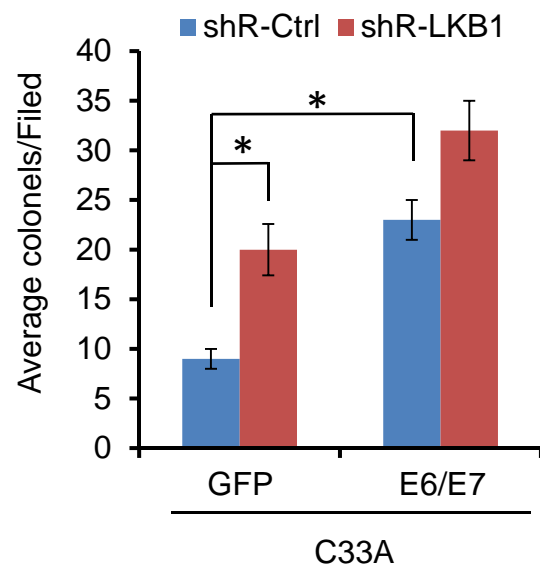

Supplement: NIHMS800618-supplement-4.pdf [file NIHMS800618-supplement-4.pdf]

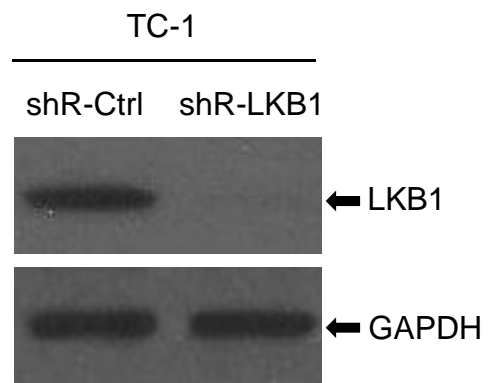

Supplementary Figure 4

Supplement: NIHMS800618-supplement-5.pdf [file NIHMS800618-supplement-5.pdf]

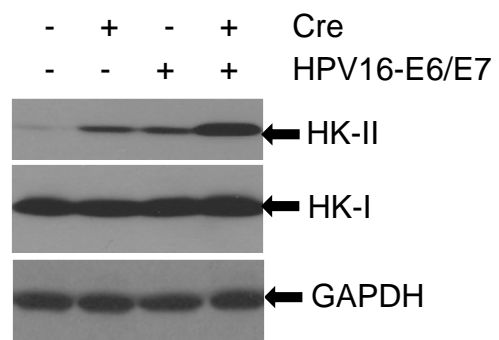

Supplementary Fig. 5

Supplement: NIHMS800618-supplement-6.pdf [file NIHMS800618-supplement-6.pdf]

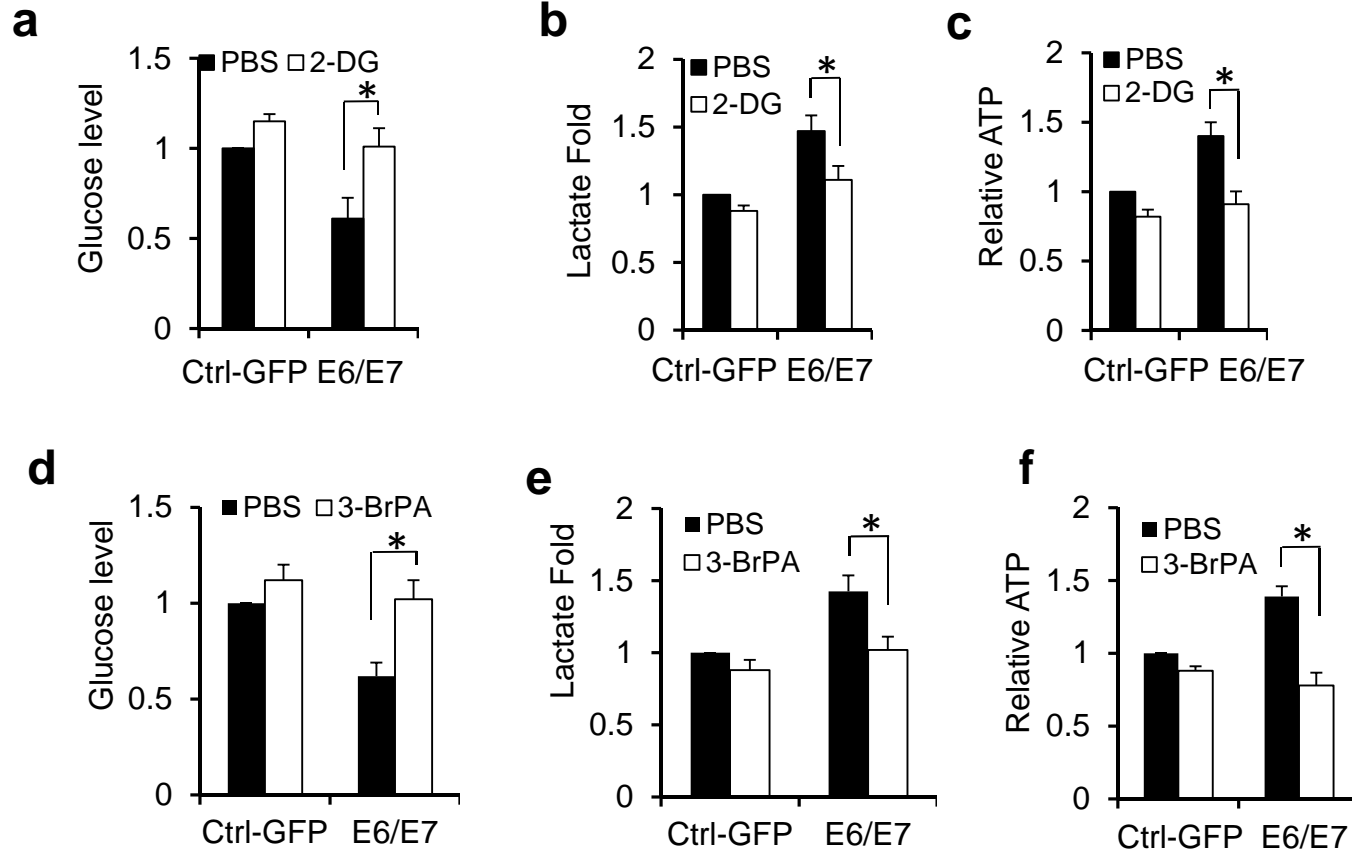

Supplementary Fig. 6

Supplement: NIHMS800618-supplement-7.pdf [file NIHMS800618-supplement-7.pdf]

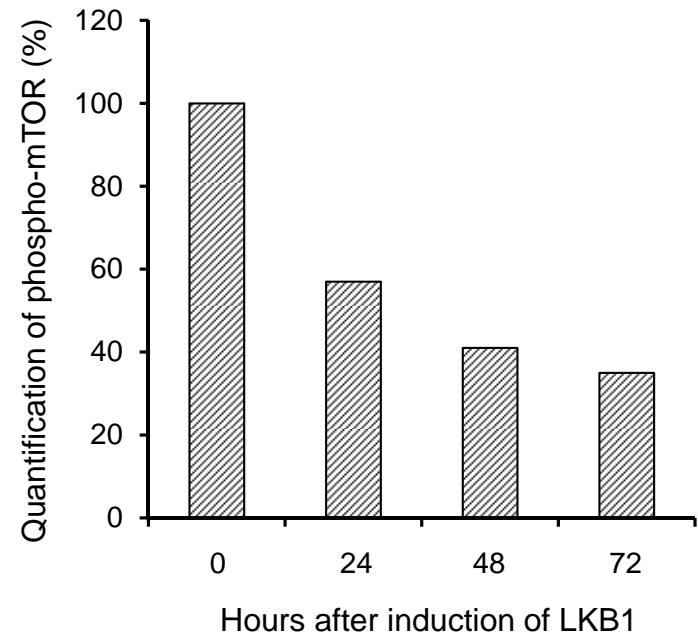

Supplementary Figure 8

Supplement: NIHMS800618-supplement-9.pdf [file NIHMS800618-supplement-9.pdf]
